# Supplementary material
Source: Elsevier journal article supplement (https://eprints.lib.hokudai.ac.jp/dspace/bitstream/2115/57666/7/mmc6.xlsx)
Supplement: mmc6 [file mmc6.xlsx]

## Sheet: Sheet1
Table S5. AF- and PF-specific proteins Proteins listed in the table were identified by two or more peptides."Accession Number" and "Description" were obtained from Mascot analysis; "GO annotation" was obtained from Gene Ontology analysis.
AF-specific proteins
Accession number	Description	GO annotation
CBJ30163.1	similar to titin isoform N2-B	function unknown protein
CBJ28331.1	Tubular mastigoneme-related protein	tubular mastigoneme-related protein
CBJ29112.1	conserved unknown protein	tpr repeat-containing protein
PF-specific proteins
Accession number	Description	GO annotation
CBJ26132.1*	PAS/PAC sensor hybrid histidine kinase putative blue light receptor	pas pac sensor protein
CBN79257.1	kinesin-like protein	kinesin motor domain-containing protein
CBN79843.1	Flagellar WD repeat-containing protein Pf 20	flagellar wd repeat-containing protein pf 20
CBN80239.1	p28, 28 kDa light chain of axonemal inner dynein arms	axonemal dynein light chain p33
CBJ34262.1	conserved unknown protein	dynein heavy chain
CBJ27174.1	phosphatase PP1	serine threonine-protein phosphatase pp1
CBJ27698.1	conserved unknown protein	glucosidase 2 subunit
CBJ29307.1	Heat shock protein 70, likely pseudogene	heat shock protein 70
CBJ48963.1	Arf1, ARF family GTPase	adp-ribosylation factor
CBJ25580.1	flagellar associated protein	wd repeat-containing protein 65
CBN78577.1	udp-n-acetylglucosamine pyrophosphorylase	udp-n-acetylglucosamine pyrophosphorylase
CBN75446.1	conserved unknown protein	conserved unknown protein
CBN75242.1	flagellar radial spoke protein 16	dnaj heat shock protein
CBJ34040.1	conserved unknown protein	camp-dependent protein kinase regulatory subunit
*HELMCHROME, a candidate blue light receptor protein that was discussed in the text.
